# Supplementary material
Source: publisher site journal article supplement (https://www.dovepress.com/article/300454)
Supplement: Supplementary file 1 [file get_supplementary_file.php]

| **SUPPLEMENTAL TABLE S1:** **cohort demographic and clinical information** | | | | | | |
| --- | --- | --- | --- | --- | --- | --- |
| **ID** | **sex** | **age (mo.)** | **type** | **FEM** | **strabismus dist.** | **Refraction OD** |
| **strabismus near** | **Refraction OS** |
| **JM1** | F | 158 | S | NN | ortho | +5.00 +1.25 x 100 |
| ortho | +5.00 +1.25 x 080 |
| **JM2** | F | 138 | S | NN | ortho | +6.50 +1.00 x 075 |
| ortho | +6.50 +1.00 x 105 |
| **JM3** | M | 124 | M | NN | ortho | +3.50 sphere |
| ortho | +5.25 +1.00 x 100 |
| **JM4** | F | 109 | S | FMNS | ortho | +5.5 +1.50 x 085 |
| RE(T) 4 | +5.50 +1.00 x 095 |
| **JM5** | F | 89 | M | NN | ortho | -11.50 +8.00 x 104 |
| ortho | -0.25 +1.25 x 079 |
| **JM6** | F | 122 | C | C | ortho | +0.25 sphere |
| ortho | +0.25 sphere |
| **JM7** | F | 85 | M | nyst | ortho | -0.25 sphere |
| ortho | -12.50 +3.50 x 120 |
| **JM8** | F | 129 | C | C | ortho | -1.50 +0.25 x 075 |
| ortho | -1.50 +0.25 x 070 |
| **JM9** | M | 367 | A | nyst | ortho | +1.25 +2.75 x 080 |
| ortho | -.25 +.75 x 100 |
| **JM10** | F | 98 | A | nyst | ortho | +2.50 +0.50 x 080 |
| ortho | +0.75 +0.50 x 100 |
| **JM11** | F | 125 | C | C | ortho | +0.25 sphere |
| ortho | +0.25 sphere |
| **JM12** | F | 140 | M | nyst | ortho | +1.50 +0.50 x 070 |
| E(T) flick | +3.50 +0.50 x 120 |
| **JM13** | M | 108 | A | NN | ortho | +6.00 +0.50 x 055 |
| ortho | +0.75 sphere |
| **JM14** | M | 123 | M | NN | RXT 8 | -13.50 +2.00 x 080 |
| ortho | -7.50 +1.25 x 080 |
| **JM15** | M | 132 | M | FMNS | RXT 10, DVD | +3.00 +3.25 x 085 |
| RXT 10, DVD | +2.50 + 2.75 x 095 |
| **JM16** | M | 97 | A | NN | ortho | +4.50 +1.25 x 045 |
| ortho | +0.25 sphere |
| **JM17** | M | 120 | A | nyst | ortho | plano |
| ortho | -12.00 +3.00 x 060 |
| **JM18** | M | 118 | M | NN | ortho | +5.50 +2.50 x 090 |
| ortho | +1.25 +0.25 x 090 |
| **JM19** | F | 148 | M | FMNS | X(T) 4 | +5.00 +0.75 x 080 |
| X(T) 8 | +3.50 +1.25 x 095 |
| **JM20** | F | 111 | M | NN | ortho | +4.00 +2.50 x 110 |
| ortho | +4.00 +3.50 x 080 |
| **JM21** | M | 116 | M | FMNS | E(T) 8, LHT 1 | +4.50 +0.75 x 050 |
| E(T) 6 DVD | +3.75 +0.50 x 130 |
| **JM22** | M | 111 | A | NN | ortho | +0.25 +0.25 x 090 |
| ortho | +5.00 +0.50 x 100 |
| **JM23** | F | 180 | C | C | ortho | -1.50 + 0.50 x 030 |
| ortho | -1.00 sphere |
| **JM24** | F | 124 | C | C | ortho | -1.50 sphere |
| ortho | -1.75 sphere |
| **JM25** | M | 153 | M | FMNS | E(T) 4 | +1.50 +1.00 x 080 |
| E(T) 8 | +2.50 +1.25 x 100 |
| **JM26** | F | 172 | C | C | ortho | -0.75+0.75 x 015 |
| ortho | -0.75+0.75 x 175 |
| **JM27** | F | 133 | C | C | ortho | -1.75 sphere |
| ortho | -2.5+0.75 x 054 |
| **JM28** | F | 106 | C | C | ortho | +0.50 sphere |
| ortho | +0.50 sphere |
| **JM29** | M | 111 | C | C | ortho | -4.25 + 0.50 x 085 |
| ortho | -4.00 +0.50 x 095 |
| **JM30** | M | 119 | M | NN | ortho | +5.25 +2.00 x 066 |
| ortho | +1.00 +0.50 x 080 |
| **JM31** | F | 771 | S | FMNS | LXT 8 | +5.50 +0.75 x 090 |
| LXT 8 | +5.25 +0.25 x 070 |
| **JM32** | F | 128 | M | nyst | ortho | -2.50 +1.00 x 045 |
| ortho | -14.00 +3.25 x 100 |
| **JM34** | M | 175 | S | FMNS | E(T) 2 | +3.00 +0.50 x 045 |
| RH(T) 2 | +2.75 +0.50 x 175 |
| **JM35** | F | 129 | A | nyst | X(T) flick | +0.50 sphere |
| X(T) 2 | +2.50 +2.00 x 115 |
| **JM36** | F | 120 | M | nyst | ortho | plano +2.25 x 120 |
| ortho | +1.00 +2.75 x 095 |
| **JM37** | M | 122 | S | nyst | ortho | +3.25 +0.50 x 040 |
| LET 12 | +2.50 +0.75 x 040 |
| **JM38** | F | 455 | M | FMNS | RE(T) | +3.50 +0.50 x 030 |
| RE(T) 10 | +1.75 sphere |
| **JM39** | F | 133 | A | nyst | ortho | +3.50 +0.50 x 030 |
| ortho | +1.75 sphere |
| **JM40** | M | 85 | C | C | ortho | +1.00 sphere |
| ortho | +1.00 sphere |
| **JM41** | F | 125 | C | C | ortho | +4.00 +0.25 x 070 |
| ortho | +3.50 sphere |
| **JM42** | F | 104 | C | C | ortho | -0.25 sphere |
| ortho | -0.5 sphere |
| **JM43** | F | 165 | C | C | ortho | -0.25 sphere |
| ortho | -0.25 sphere |
| **JM44** | F | 135 | M | FMNS | - | -2.25 +0.50 x 085 |
| E(T) flick | -0.50 +1.50 x 098 |
| **JM45** | F | 121 | A | NN | ortho | -0.25 +0.25 x 090 |
| ortho | +0.25 +1.75 x 090 |
| **JM46** | F | 355 | S | FMNS | X(T) 4, DVD | -0.25 +0.75 x 020 |
| X(T) 4, DVD | -0.50 +.50 x 170 |
| **JM47** | F | 128 | A | NN | ortho | plano +2.00 x 090 |
| ortho | -0.25 +4.75 x 073 |
| **JM48** | M | 97 | M | NN | ortho | +1.75 +1.25 x 105 |
| ortho | +4.00 +1.50 x 075 |
| **JM49** | M | 135 | M | nyst | RET 4, RDVD | +5.00 + 0.75 x 060 |
| RET 6, RDVD | +1.00 +0.50 x 090 |
| **JM50** | F | 180 | C | C | ortho | -0.5+0.50 x 090 |
| ortho | -0.75+0.50 X 090 |
| **JM51** | F | 180 | C | C | ortho | -4.25 +0.50 x 080 |
| ortho | -4.00 +0.50 x 112 |
| **JM52** | M | 151 | C | C | ortho | -2.25 +0.50 x 095 |
| ortho | +2.25 +0.50 x 085 |
| **JM53** | M | 151 | C | C | ortho | -1.75 +0.50 x 019 |
| ortho | -1.25 +0.25 x 160 |
| **JM54** | F | 78 | M | nyst | ortho | +2.50 +0.50 x 075 |
| ortho | +4.50 +0.50 x 120 |
| **JM55** | M | 136 | C | C | ortho | +0.75+0.75 x 090 |
| ortho | +0.75+0.75 x 080 |
| **JM56** | F | 158 | A | NN | ortho | -0.50 +1.00 x 080 |
| ortho | +0.25 +2.75 x 090 |
| **JM57** | F | 130 | A | NN | ortho | +5.50 +0.75 x 120 |
| ortho | +0.75 +0.25 x 060 |
| **JM58** | F | 140 | S | nyst | RX(T) 10, RH(T) 4 | +1.75 +1.25 x 040 |
| RX(T) 2 | +1.75 sphere |
| **JM59** | F | 81 | M | NN | X(T) 6 | +5.00 +0.75 x 045 |
| X(T) 6 | +4.00 +0.25 x 130 |
| **JM60** | F | 74 | A | NN | ortho | -0.25 sphere |
| ortho | -3.25 +2.75 x 080 |
| **JM61** | M | 105 | S | FMNS | E(T) 8 | +2.50 +2.25 x 100 |
| E(T) 12 | +2.50 +3.25 x 080 |
| **JM62** | M | 132 | M | nyst | DVD | +3.00 +0.50 x 080 |
| ortho | plano |
| **JM63** | M | 78 | C | C | ortho | -0.25 sphere |
| ortho | -0.5 sphere |
| **JM64** | F | 414 | S | FMNS | LXT4 DVD | +2.25 +2.50 x 085 |
| LXT 4 DVD | +2.00 +2.50 x 095 |

Note on clinical strabismus notation: ortho = orthophoric. R= Right eye, L= Left eye, ET= Esotropia, XT= Exotropia, E(T) = Intermittent esotropia, X(T)= Intermittent Exotropia, H= Hypertropia, H(T)= Intermittent Hypertropia, DVD= Dissociated Vertical deviation, R and L = Right and Left Eye, respectively. Strabismus is specified using the format [R|L]<X|E|H><T|(T)>N. N is the magnitude of the deviation in prism diopters.

**Legends**

**Supplemental Table 1:** Demographic and clinical information for the study cohort. Columns indicate (left to right) study ID, sex, age in months at the time of data collection, amblyopia type (C: control, A: anisometropic, S: strabismic, M: mixed), FEM characteristic type (C: control, NN: no nystagmus, nyst: nystagmus without FMNS, FMNS: fusion maldevelopment nystagmus), strabismus measurement at distance (top) and near (bottom), and refraction in the right (top) and left (bottom) eyes.
